# Supplementary material
Source: PubMed Central journal article supplement (PMC2851245)

## Supplementary Figure S1

**Figure S1.** PAR<sub>2</sub> agonist peptide (AP) attenuates LPS-induced TLR4/TRIF responses in human EC lines. Relative gene expression was analyzed by quantitative real-time PCR. **(A).** SW620 cells were treated with medium or LPS (0.1 μg/ml), in the absence or presence of PAR<sub>2</sub> AP (300 μM) for 3 hr. Data are presented as the mean ± s.d., representative of 2 separate experiments. **(B).** A549 cells were treated with medium or LPS (1 μg/ml) for 4 hr in the absence or presence of PAR<sub>2</sub> AP (300 μM). Data are presented as the mean ± s.d., representative of 2 separate experiments. \*,  $p < 0.05$

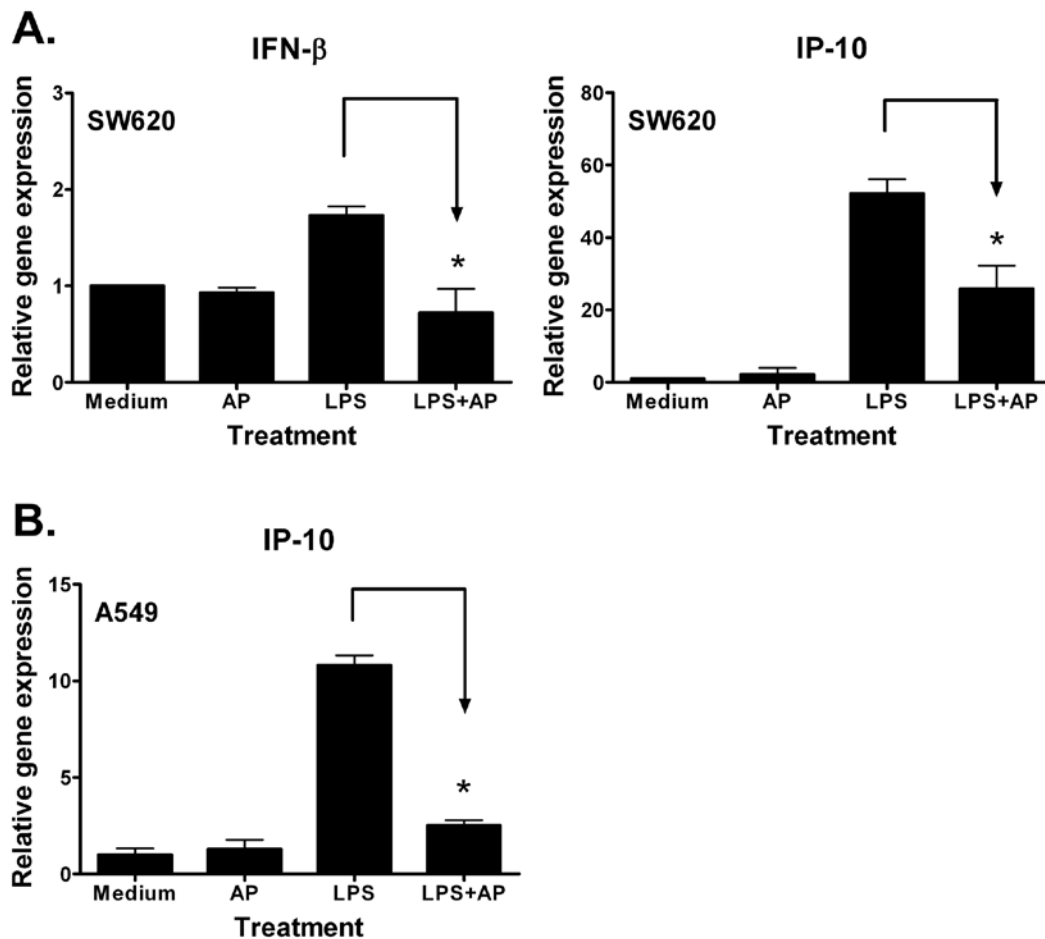

Supplement: NIHMS185105-supplement-01.pdf [file NIHMS185105-supplement-01.pdf]
